# Supplementary material
Source: Springer Nature journal article supplement (https://www.springermedizin.de/resource/supplementary/12885_2011_3019_MOESM8_ESM.pdf/9462500)

# HT29

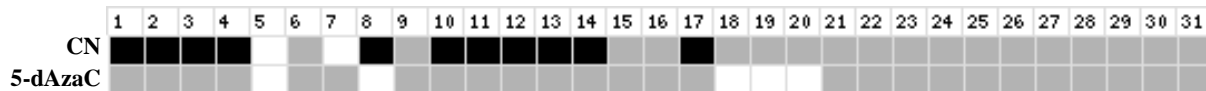

# SW707

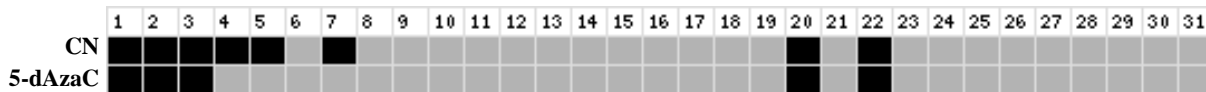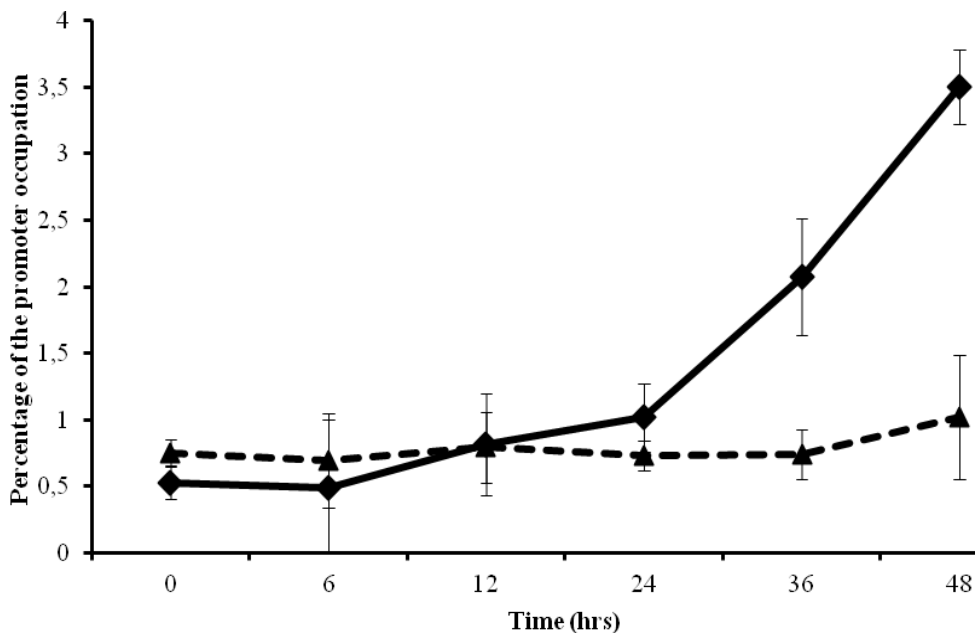

Supplement: MOESM8 [file 9462500]
